# Supplementary material for: Salivary Cytokines as Biomarkers for Oral Squamous Cell Carcinoma: A Systematic Review
Source: MDPI journal article supplement (doi:10.3390/ijms22136795), 2021-06-24
Supplement: s1 [file s1]

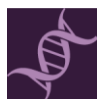

Review

# Salivary Cytokines as Biomarkers for Oral Squamous Cell Carcinoma: A Systematic Review

Elena Ferrari <sup>1</sup>, Margherita E. Pezzi <sup>2</sup>, Diana Cassi <sup>3</sup>, Thelma A. Pertinhez <sup>1,\*</sup>, Alberto Spisni <sup>1</sup> and Marco Meleti <sup>1,2</sup>

<sup>1</sup> Department of Medicine and Surgery, University of Parma, Parma, Italy

<sup>2</sup> Centro Universitario Odontoiatria, University of Parma, Parma, Italy

<sup>3</sup> Dentistry and Oral and Maxillofacial Surgery, Department of Surgical, Medical, Dental and Morphological Science with interest in Transplant Oncological and Regenerative Medicine, University of Modena and Reggio Emilia, Modena, Italy

\* Correspondence: [thelma.pertinhez@unipr.it](mailto:thelma.pertinhez@unipr.it)

## SUPPLEMENTARY TABLES

**Table S1.** Risk of specific bias for the included studies.

| Ref.  | Q1 | Q2 | Q3 | Q4 | Q5 | Q6 | Q7 | Q8 | yes (%) | Risk of bias |
|-------|----|----|----|----|----|----|----|----|---------|--------------|
| [27]  | ✓  | ✓  | ✓  | ✓  | ✓  | ✓  | ✓  | ✓  | 100     | no           |
| [28]  | ✓  | ✓  | ✓  | ✓  | ✓  | ✓  | ✓  | ✓  | 100     | no           |
| [29]  | ✓  | ✓  | ✓  | ✓  | ✓  | ✓  | ✓  | ✓  | 100     | no           |
| [32]  | ✓  | ✓  | ✓  | ✓  | –  | –  | ✓  | ✓  | 75      | +            |
| [33]  | ✓  | ✓  | ✓  | ✓  | ✓  | ✓  | ✓  | ✓  | 75      | +            |
| [34]  | ✓  | ✓  | ✓  | ✓  | –  | –  | ✓  | ✓  | 75      | +            |
| [35]  | ✓  | ✓  | ✓  | ✓  | ✓  | ✓  | ✓  | ✓  | 100     | no           |
| [36]  | ✓  | ✓  | ✓  | ✓  | ✓  | ✓  | ✓  | ✓  | 75      | +            |
| [37]- | ✓  | ✓  | ✓  | ✓  | –  | –  | ✓  | ✓  | 100     | no           |
| [38]  | ✓  | ✓  | ✓  | ✓  | ✓  | ✓  | ✓  | ✓  | 100     | no           |
| [39]  | ✓  | ✓  | ✓  | ✓  | ✓  | ✓  | ✓  | ✓  | 75      | +            |

|      |   |   |   |   |   |   |   |   |     |    |
|------|---|---|---|---|---|---|---|---|-----|----|
| [40] | ✓ | ✓ | ✓ | ✓ | ✓ | ✓ | ✓ | ✓ | 100 | no |
| [41] | ✓ | ✓ | ✓ | ✓ | ✓ | ✓ | ✓ | ✓ | 100 | no |
| [42] | ✓ | ✓ | ✓ | ✓ | ✓ | ✓ | ✓ | ✓ | 100 | no |
| [43] | ✓ | ✓ | ✓ | ✓ | ✓ | ✓ | ✓ | ✓ | 100 | no |
| [44] | ✓ | ✓ | ✓ | ✓ | ✓ | ✓ | ✓ | ✓ | 100 | no |
| [45] | ✓ | ✓ | ✓ | ✓ | ✓ | ✓ | ✓ | ✓ | 100 | no |
| [46] | ✓ | ✓ | ✓ | ✓ | ✓ | ✓ | ✓ | ✓ | 100 | no |
| [47] | ✓ | ✓ | ✓ | ✓ | ✓ | ✓ | ✓ | ✓ | 100 | no |
| [48] | ✓ | ✓ | ✓ | ✓ | ✓ | ✓ | ✓ | ✓ | 100 | no |
| [49] | ✓ | ✓ | ✓ | ✓ | ✓ | ✓ | ✓ | ✓ | 100 | no |
| [50] | ✓ | ✓ | ✓ | ✓ | ✓ | ✓ | ✓ | ✓ | 100 | no |
| [51] | ✓ | ✓ | ✓ | ✓ | – | – | ✓ | ✓ | 75  | +  |
| [52] | ✓ | ✓ | ✓ | ✓ | ✓ | ✓ | ✓ | ✓ | 100 | no |
| [53] | ✓ | ✓ | ✓ | ✓ | ✓ | ✓ | ✓ | ✓ | 100 | no |
| [54] | ✓ | ✓ | ✓ | ✓ | ✓ | ✓ | ✓ | ✓ | 100 | no |
| [55] | ✓ | ✓ | ✓ | ✓ | ✓ | ✓ | ✓ | ✓ | 100 | no |

Questions: "Q1. Were the criteria for inclusion in the sample clearly defined? Q2. Were the study subjects and the setting described in detail? Q3. Was the exposure (quantitative analysis of salivary cytokine) measured in a valid and reliable way? Q4. Were objective, standard criteria used for measurement of the condition? Q5. Were confounding factors identified? Q6. Were strategies to deal with confounding factors stated? Q7. Were the outcomes (OSCC disease) measured in a valid and reliable way? Q8. Was appropriate statistical analysis used?

Answer: ✓: yes; –: no.

Risk of bias: *no*: no risk; *+*: low risk (25% of the answers are negative).

Negative points in Table S1 are in response to Question number 5 and 6, regarding confounding factors. In the reviewed studies, potential confounders were chronic or acute inflammatory conditions (periodontitis, gingivitis), systemic diseases, and unhealthy habits (such as alcohol abuse, tobacco). In most of the articles, confounding was reduced by restricting the study population; for example, subjects with comorbidities were not included in the study population. Alternatively, a matching strategy was used; for example, selected cases were matched to controls by means of their comparable periodontal status. When confounders were not assessed, prevented, or excluded we assigned a negative point.

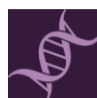

Table S2 - Demographic profile of OSCC patients involved in the included studies.

|    | Ref. | cytokine                                                                                | Number of patients | Country of origin | Gender |    | Mean age $\pm$ SD (y) |
|----|------|-----------------------------------------------------------------------------------------|--------------------|-------------------|--------|----|-----------------------|
|    |      |                                                                                         |                    |                   | F      | M  |                       |
| 1  | [27] | IL-1 $\alpha$ , IL-6, IL-8, TNF- $\alpha$ , HCC-1, MCP-1, PF-4                          | 66                 | Spain             | 33     | 33 | 65 $\pm$ 15.6         |
| 2  | [28] | IL-10, IL-13, IL-1RA, IL-4                                                              | 30                 | Pakistan          | 6      | 24 | 50.3 $\pm$ 15.6       |
| 3  | [29] | IL-1 $\alpha$ , IL-6, TNF- $\alpha$                                                     | 28                 | Croatia           | 6      | 22 | 61.9                  |
| 4  | [32] | IL-6, IL-8                                                                              | 35                 | Pakistan          | 11     | 24 | 46.7 $\pm$ 14.4       |
| 5  | [33] | IL-1 $\alpha$ , IL-6, IL-8, osteopontin                                                 | 19                 | Japan             | 10     | 9  | 60.9                  |
| 6  | [34] | IL-1, IL-6, IL-8, TNF- $\alpha$                                                         | 13                 | USA               | 3      | 10 | 59.5 $\pm$ 6.7        |
| 7  | [35] | IL-6, TNF- $\alpha$                                                                     | 19                 | Croatia           | 7      | 12 | 54.2 $\pm$ 8.4        |
| 8  | [36] | IL-1 $\alpha$ , IL-6, IL-8 TNF- $\alpha$ , VEGF-a                                       | 18                 | USA               | 6      | 12 | 56.5 $\pm$ 13.6       |
| 9  | [37] | IL-1 $\alpha$ , IL-6, IL-8, GM-CSF                                                      | 30                 | Iraq              | 14     | 16 | 53                    |
| 10 | [38] | IL-1 $\alpha$ , IL-6, IL-8, TNF- $\alpha$                                               | 9                  | Iran              | 5      | 4  | 71.3 $\pm$ 7.8        |
| 11 | [39] | IL-10, TNF- $\alpha$ , TGF- $\alpha$ , VEGF                                             | 78                 | Poland            | 7      | 71 | 63.8                  |
| 12 | [40] | IL-1 $\alpha$ , IL-8                                                                    | 60                 | USA               | 3      | 57 | 51.7                  |
| 13 | [41] | IL-8                                                                                    | 25                 | India             | 9      | 16 | 53.2 $\pm$ 11.4       |
| 14 | [42] | IL-6, IL-8, IL-1 $\beta$ , TNF- $\alpha$ , IFN- $\gamma$ , MIP-1 $\beta$ , Eotaxin, GRO | 41                 | Taiwan            | 5      | 36 | 55.0                  |
| 15 | [43] | IL-6                                                                                    | 100                | India             | 32     | 68 | 21-90*                |
| 16 | [44] | IL-8                                                                                    | 100                | India             | 32     | 68 | 21-90*                |
| 17 | [45] | TNF- $\alpha$                                                                           | 30                 | India             | 9      | 21 | 57.8 $\pm$ 9.4        |
| 18 | [46] | TNF- $\alpha$                                                                           | 100                | India             | 32     | 68 | 21-90*                |
| 19 | [47] | TNF- $\alpha$                                                                           | 30                 | India             | 4      | 26 | 24-74*                |
| 20 | [48] | IL-6, IL-8                                                                              | 18                 | USA               | 7      | 11 | 59.4                  |
| 21 | [49] | IL-8, IL-1 $\beta$                                                                      | 35                 | Serbia            | 5      | 30 | 60.9 $\pm$ 12.3       |
| 22 | [50] | IL-6                                                                                    | 25                 | India             | 4      | 21 | 49                    |
| 23 | [51] | IL-17                                                                                   | 25                 | Iraq              | 8      | 17 | 57.9 $\pm$ 10.4       |
| 24 | [52] | IL-8, IL-6, VEGF, MIP-1 $\beta$ , IP-10, IL-1 $\beta$ , INF- $\gamma$ , IL-5            | 20                 | Italy             | 10     | 10 | 64.9 $\pm$ 14.2       |
| 25 | [53] | IL-1 $\beta$                                                                            | 16                 | Japan             | 6      | 10 | 56.3 $\pm$ 5.6        |
| 26 | [54] | IL-6                                                                                    | 27                 | Japan             | 11     | 16 | 70.7 $\pm$ 8.6        |
| 27 | [55] | IL-6                                                                                    | 27                 | Japan             | 11     | 16 | 70.7 $\pm$ 8.6        |

\* range
